# Supplementary material for: An ABA-increased interaction of the PYL6 ABA receptor with MYC2 Transcription Factor: A putative link of ABA and JA signaling
Source: PubMed Central journal article supplement (PMC4928087; doi:10.1038/srep28941), 2016-06-30
Supplement: srep28941-s1.pdf [file srep28941-s1.pdf]

# **An ABA-increased interaction of the PYL6 ABA receptor with MYC2 Transcription Factor: A putative link of ABA and JA signaling.**

Fernando Aleman<sup>1¶</sup>, Junshi Yazaki<sup>2ψ</sup>, Melissa Lee<sup>1</sup>, Yohei Takahashi<sup>1,3</sup>, Alice Y. Kim<sup>2</sup>, Zixing Li<sup>1</sup>, Toshinori Kinoshita<sup>3,4</sup>, Joseph R. Ecker<sup>2,5</sup> and Julian I. Schroeder<sup>1\*</sup>.

**1** Division of Biological Sciences, Cell and Developmental Biology Section, University of California San Diego, La Jolla, California, USA.

**2** Plant Biology Laboratory, Genomic Analysis Laboratory, The Salk Institute for Biological Studies, La Jolla, California, 92037 USA.

**3** Division of Biological Science, Graduate School of Science, and **4** Institute of Transformative Bio-Molecules (WPI-ITbM), Nagoya University, Nagoya 464-8602, Japan.

**5** Howard Hughes Medical Institute, The Salk Institute for Biological Studies, La Jolla, California, 92037 USA.

ψ Present address: RIKEN Center for Integrative Medical Sciences, 1-7-22 Suehiro-cho Tsurumiku, Yokohama, Kanagawa, Japan.

¶ Present address: The Scripps Research Institute, 10550 North Torrey Pines Road, La Jolla, California, USA ([faleman@scripps.edu](mailto:faleman@scripps.edu)).

\*Correspondence should be addressed to Julian I. Schroeder, Division of Biological Sciences, Cell and Developmental Biology Section, University of California San Diego, 9500 Gilman Drive, La Jolla, CA, 92093-0116, USA ([jischroeder@ucsd.edu](mailto:jischroeder@ucsd.edu)).

**Figure S1:** Negative controls with the empty vector (BD).

**Figure S2:** *pyl6* mutant protein does not interact with MYC2 and interacts with ABI1 only in the presence of ABA.

**Figure S3:** No seed germination difference in *pyl6* mutant plants compared to control.

**Figure S4:** *pyl6* mutant plants show a reduced cotyledon emergence phenotype in the presence of 0.5 $\mu$ M ABA after 5days of growth.

**Figure S5:** MYC2 does not impaire PYL6-induced inhibition of ABI1 protein phosphatase activity.

**Figure S6:** Expression levels of JAZ6 and JAZ8 in Col-0 and *pyl6* mutants under control conditions and treated with 0.5  $\mu$ M ABA.

**Table S1:** Primers used.

Supplementary:

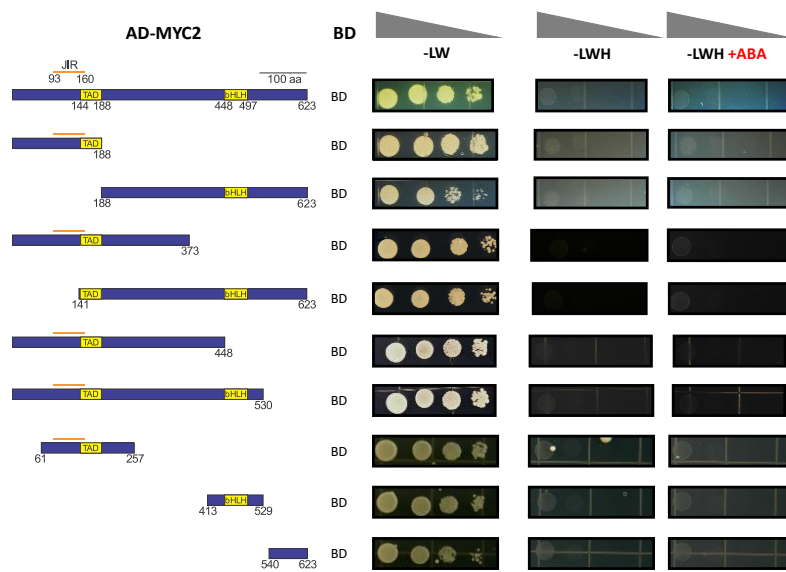

Figure S1: Negative controls with the empty vector (BD).

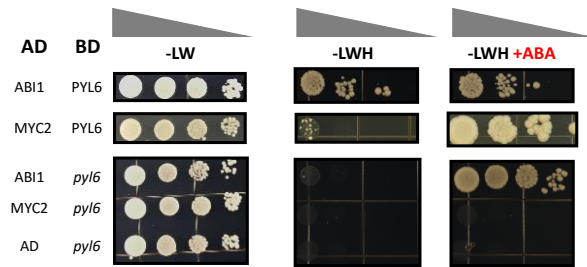

**Figure S2:** *pyl6* mutant protein does not interact with MYC2 and interacts with ABI1 only in the presence of ABA in yeast 2 hybrid assays. In the first row, WT PYL6 protein was analyzed with ABI1 as a positive control. The T-DNA insertion disrupts the last  $\alpha$ -helix domain in which two non-polar residues have been reported to be important for the binding of ABA in the case of PYL9 (Nakagawa et al. 2014).

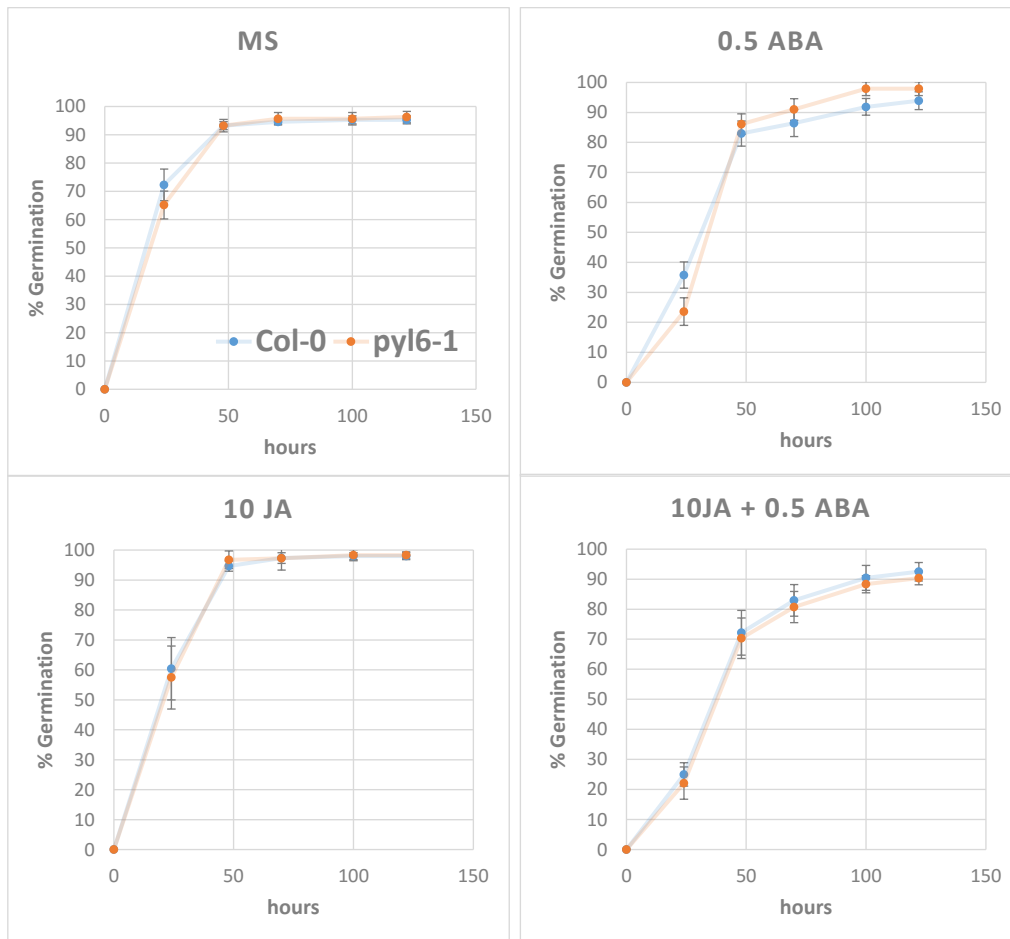

**Figure S3:** No seed germination difference in *pyl6* mutant plants compared to control. Col-0 (WT) and *pyl6* mutant seeds were sown on 1% sucrose MS media and MS supplemented with 0.5  $\mu$ M ABA, 10  $\mu$ M Me-JA, and 0.5  $\mu$ M ABA + 10  $\mu$ M Me-JA. No differences were found on the media with sucrose.

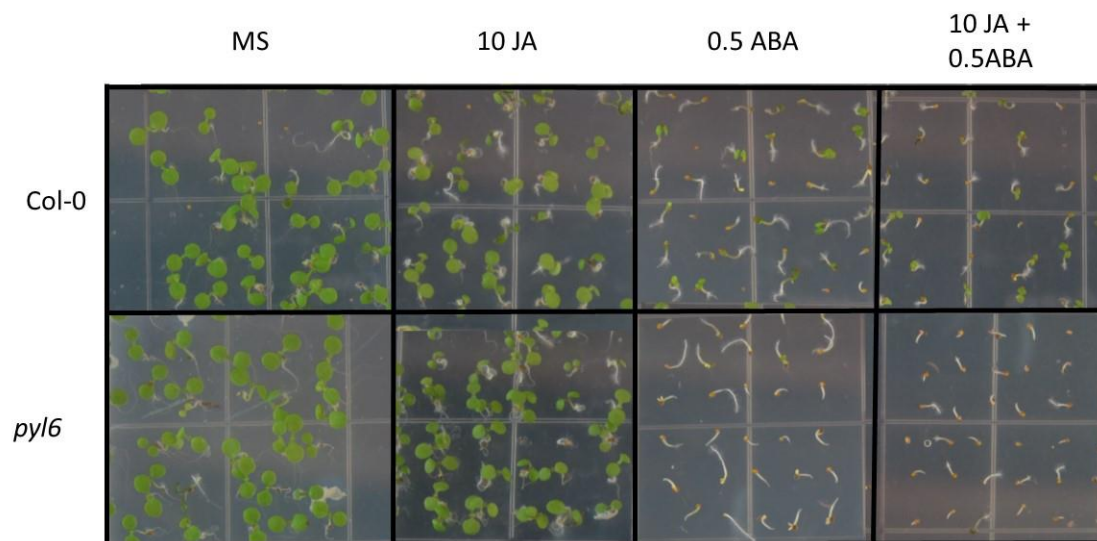

**Figure S4:** *pyl6* mutant plants show a reduced cotyledon emergence phenotype in the presence of 0.5 $\mu$ M ABA after 5 days of growth. The presence of 10 $\mu$ M JA plus 0.5 $\mu$ M ABA further increased this phenotype.

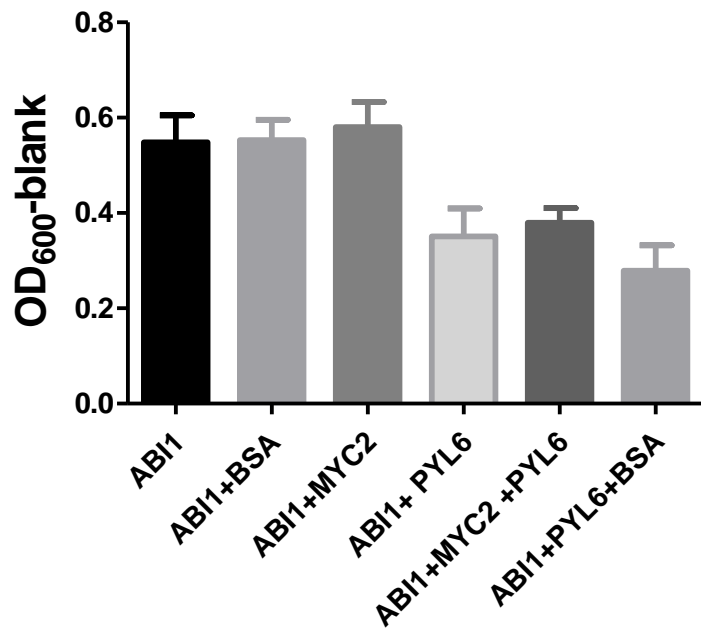

**Figure S5:** MYC2 does not impair PYL6-induced inhibition of ABI1 protein phosphatase activity. The first 3 columns show ABI1 protein phosphatase activity alone, with BSA and with MYC2. The last 3 columns show ABI1 activity with PYL6, and with the addition of either MYC2 or BSA. 10  $\mu$ M ABA was added for all conditions.

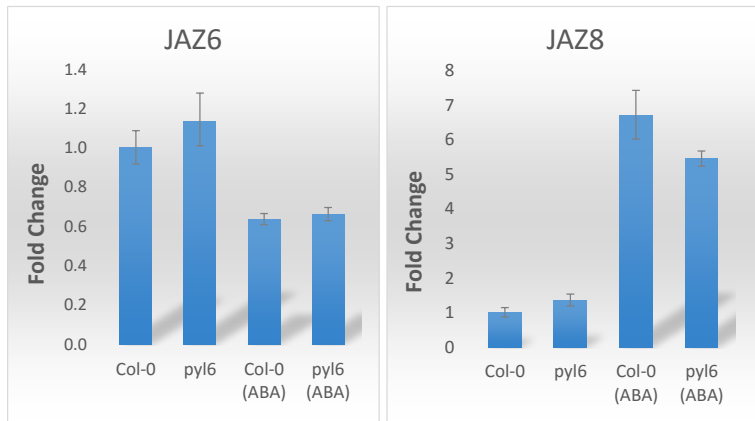

**Figure S6:** Expression level of JAZ6 and JAZ8 in Col-0 and *pyl6* mutants under control conditions and treated with 0.5  $\mu$ M ABA. Col-0 and *pyl6* mutants seeds were sown in  $\frac{1}{2}$  MS control media or  $\frac{1}{2}$  MS supplemented with 0.5  $\mu$ M ABA. qPCR experiments were performed with 11 day-old seedlings and the expression profile normalized to Col-0 in  $\frac{1}{2}$  MS media using the  $\Delta\Delta C_t$  method.



| Sequences                             | AGI       | Notes                                               |
|---------------------------------------|-----------|-----------------------------------------------------|
| GGCTTAAUatgccaacgtcgatacagtttc        | AT2G40330 | PYL6-ATG user cloning                               |
| GGTTTAAUttACGAGAATTTAGAAGTGTTTC       | AT2G40330 | PYL6-STOP user cloning                              |
| GGTTTAAUutCAATTTGCCAGCGATTGCAAG       | AT2G40330 | PYL6 c-ter delet Y2H (without 11 last aa with STOP) |
| GGCTTAAUatgactgattaccggctacaac        | AT1G32640 | MYC2 user ATG                                       |
| GGTTTAAUutAACCgATTTTTGAAATCAA         | AT1G32640 | MYC2 user STOP                                      |
| GGCTTAAUatgaggtcaccgggtgcaactcc       | AT5G05440 | PYL5 user ATG                                       |
| GGTTTAAUttATTGCCGGTTGGTACTTCGAG       | AT5G05440 | PYL5 user STOP rev                                  |
| GGCTTAAUatgaacggcacaacatcatcaatc      | AT5G46760 | MYC3 user ATG                                       |
| GGTTTAAUutCAATAGTTTTCTCCGACTTTTCG     | AT5G46760 | MYC3 user STOP rev                                  |
| GGTTTAAUccCGAGAATTTAGAAGTGTTCTC       | AT2G40330 | PYL6 Reverse cc W/out STOP codon user               |
| GGTTTAAUutcaTGCAAACGCTTTACCAGCTAAT    | AT1G32640 | MYC2 user 188 reverse                               |
| GGTTTAAUacgggtaacgcgggttgggtttc       | AT1G32640 | MYC2 user 188 forward                               |
| GGCTTAAUGAGCTTAACTCGTTGATCTCC         | AT1G32640 | MYC2 from Glu141 user forward                       |
| GGTTTAAUutcaACCTTCATCGCCGAAGTTAATA    | AT1G32640 | MYC2 from Gly373 user reverse +STOP                 |
| GGTTTAAUttATTCTACTACCGTTTCTGGCTT      | AT1G32640 | MYC2 448aa reverse +STOP                            |
| GGTTTAAUttAACTAGCACTCGCTTTTCTCCG      | AT1G32640 | MYC2 530aa reverse +STOP                            |
| GGCTTAAUgcccggatatacaagagactc         | AT1G32640 | MYC2 Ala61 Fw user                                  |
| GGTTTAAUttATCCGCCGTGCAAATGAAAAG       | AT1G32640 | MYC2 Gly257 Rv user (+STOP)                         |
| GGCTTAAUaccgccggagaatcagatcac         | AT1G32640 | MYC2 Thr413 Fw user                                 |
| GGTTTAAUttAAGCACTCGCTTTTCTCCGGC       | AT1G32640 | MYC Ala529 Rv user (+STOP)                          |
| GGCTTAAUutCGATTAACCGGTGGGGATGG        | AT1G32640 | MYC Ser540 Fw user                                  |
| GGCTTAAUtgatgaataaggttggatccg         | AT1G72450 | JAZ6 promoter fw                                    |
| GGTTTAAUutCGGCTGCGATGGCTAATAC         | AT1G72450 | JAZ6 promoter Rv                                    |
| GGCTTAAUacaaatccaaaaggaccaa           | At1g30135 | JAZ8 user promoter forward                          |
| GGTTTAAUGTATATGGATTGAGATTATGTTGAT     | At1g30135 | JAZ8 user promoter reverse                          |
| ACTTGGTAuGTATATGGATTGAGATTATGTTGAT    | At1g30135 | JAZ8 promoter F1 reverse                            |
| ATACCAAGuacaaatccaaaaggaccaa          | At1g30135 | JAZ8 promoter F2 forward                            |
| ATATATAuGTATATGGATTGAGATTATGTTGAT     | At1g30135 | JAZ8 promoter F2 reverse                            |
| ATATATAuacaaatccaaaaggaccaa           | At1g30135 | JAZ8 promoter F3 forward                            |
| AGTGAGTACAAuGTATATGGATTGAGATTATGTTGAT | At1g30135 | JAZ8 reverse fragment A                             |
| attgtactcacUacaaatccaaaaggaccaa       | At1g30135 | JAZ8 forward fragment B                             |
| ttctcagtcctcctcctcgtcgtg              | AT2G40330 | PYL6 Forward for qPCR                               |
| ATCGACCAGACTGTGGAAACCG                | AT2G40330 | PYL6 Reverse for qPCR                               |
| ggteggatcctccaaacaagt                 | At1g30135 | JAZ8 Forward qPCR                                   |
| CGTCGTGAATGGTACGGTGAAG                | At1g30135 | JAZ8 Reverse qPCR                                   |
| tcccgatcttaacgagccaacg                | AT1G72450 | JAZ6 Forward qPCR                                   |
| ACCTGATGTTGCTGCCAGTTTC                | AT1G72450 | JAZ6 Reverse qPCR                                   |

**Supporting Table: Table S1:** Primers used.

Nakagawa M, Kagiya M, Shibata N, Hirano Y, Hakoshima T (2014) Mechanism of high-affinity abscisic acid binding to PYL9/RCAR1. *Genes to Cells* 19 (5):386-404. doi:10.1111/gtc.12140
